# Supplementary material
Source: publisher figshare collection journal article supplement (https://gsapubs.figshare.com/ndownloader/files/31310875)
Supplement: Supplementary file 1 [file 31310875]

Contents of file:

- Figures S1 to S7

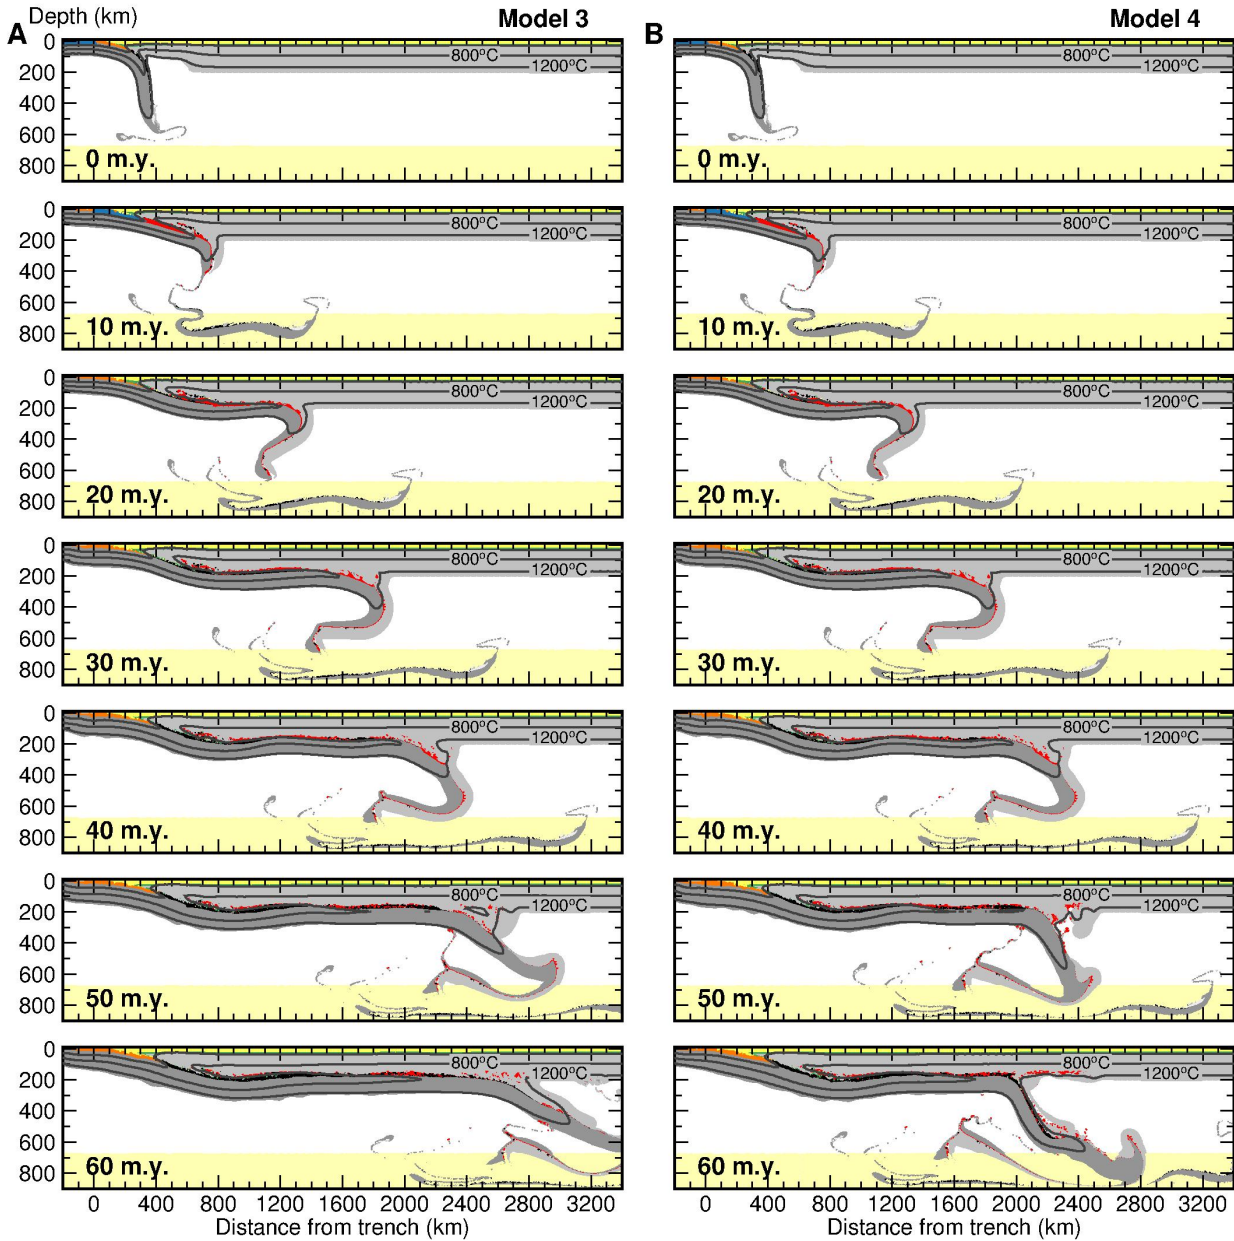

**Figure S1.** Evolution of (A) Model 3 in which the plate velocities do not change during the model run and (B) Model 4 in which the continent is stationary after 40 m.y. (convergence rate is 7 cm/yr). The oceanic plateau remains metastable in both models (red particles). Material colours as in Figure 1; black lines are isotherms every 400°C.

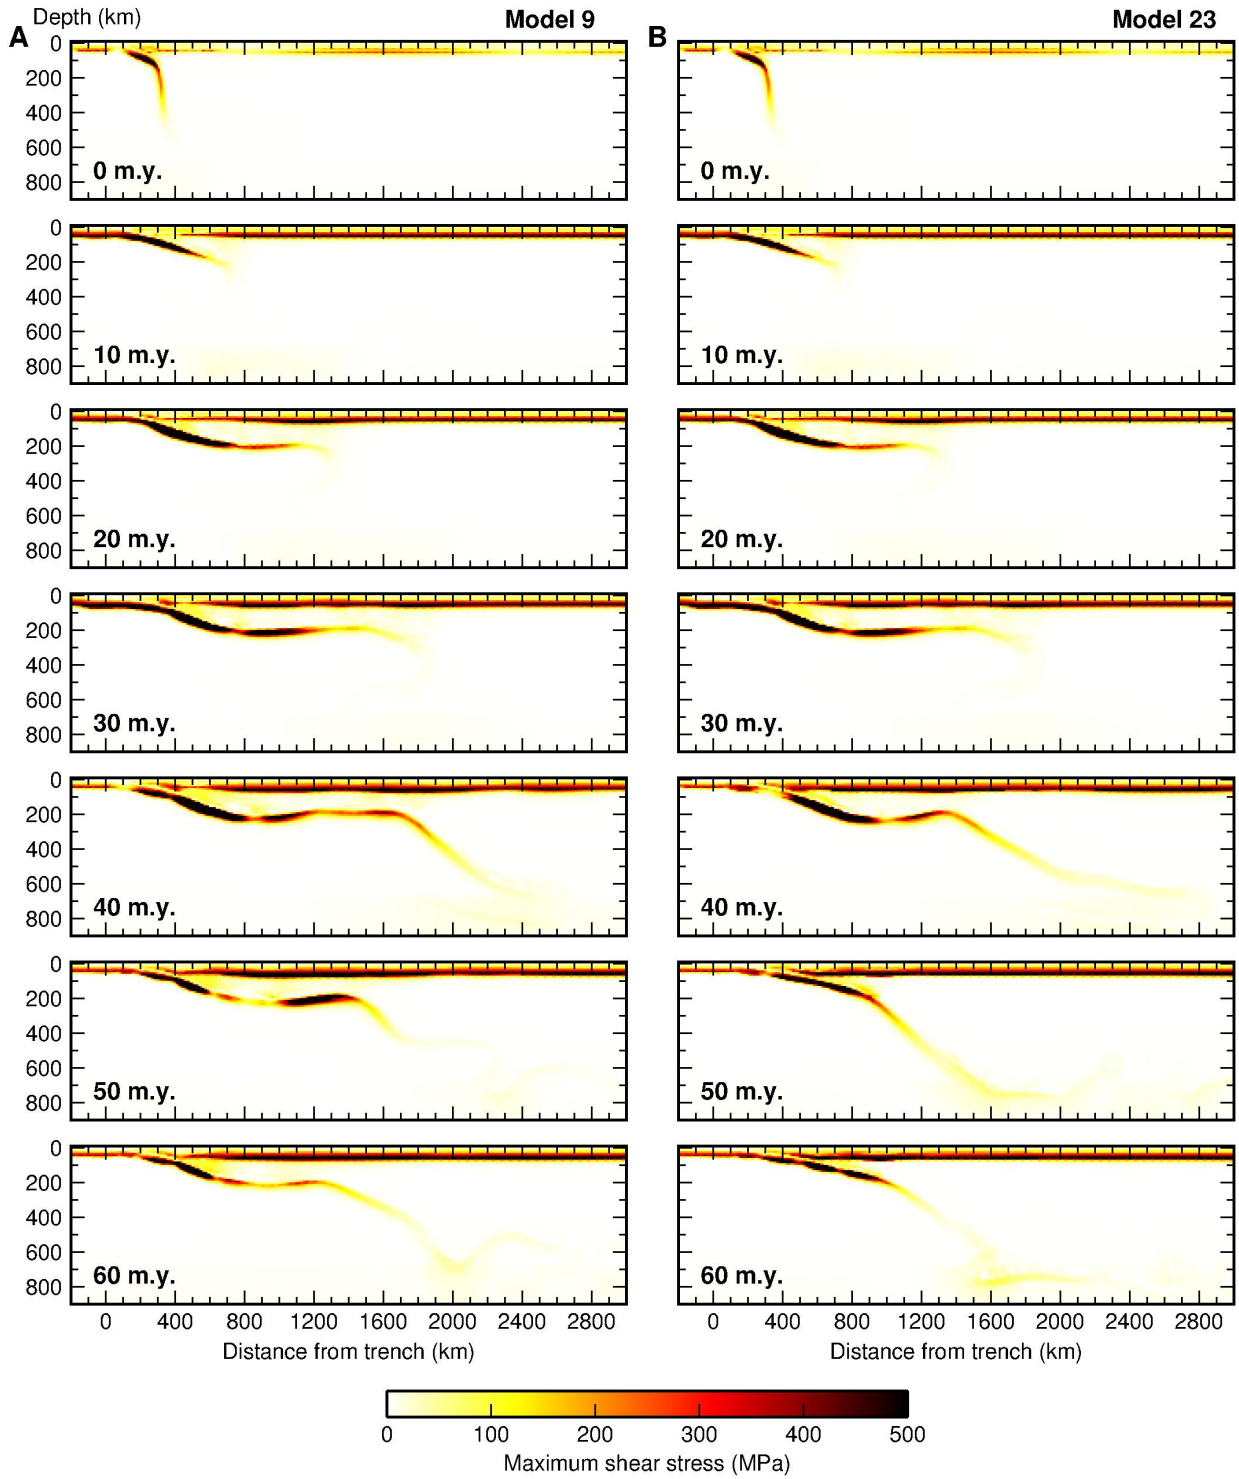

**Figure S2.** The second invariant of the deviatoric stress tensor (i.e., the maximum shear stress) during the evolution of (A) Model 9 and (B) Model 23.

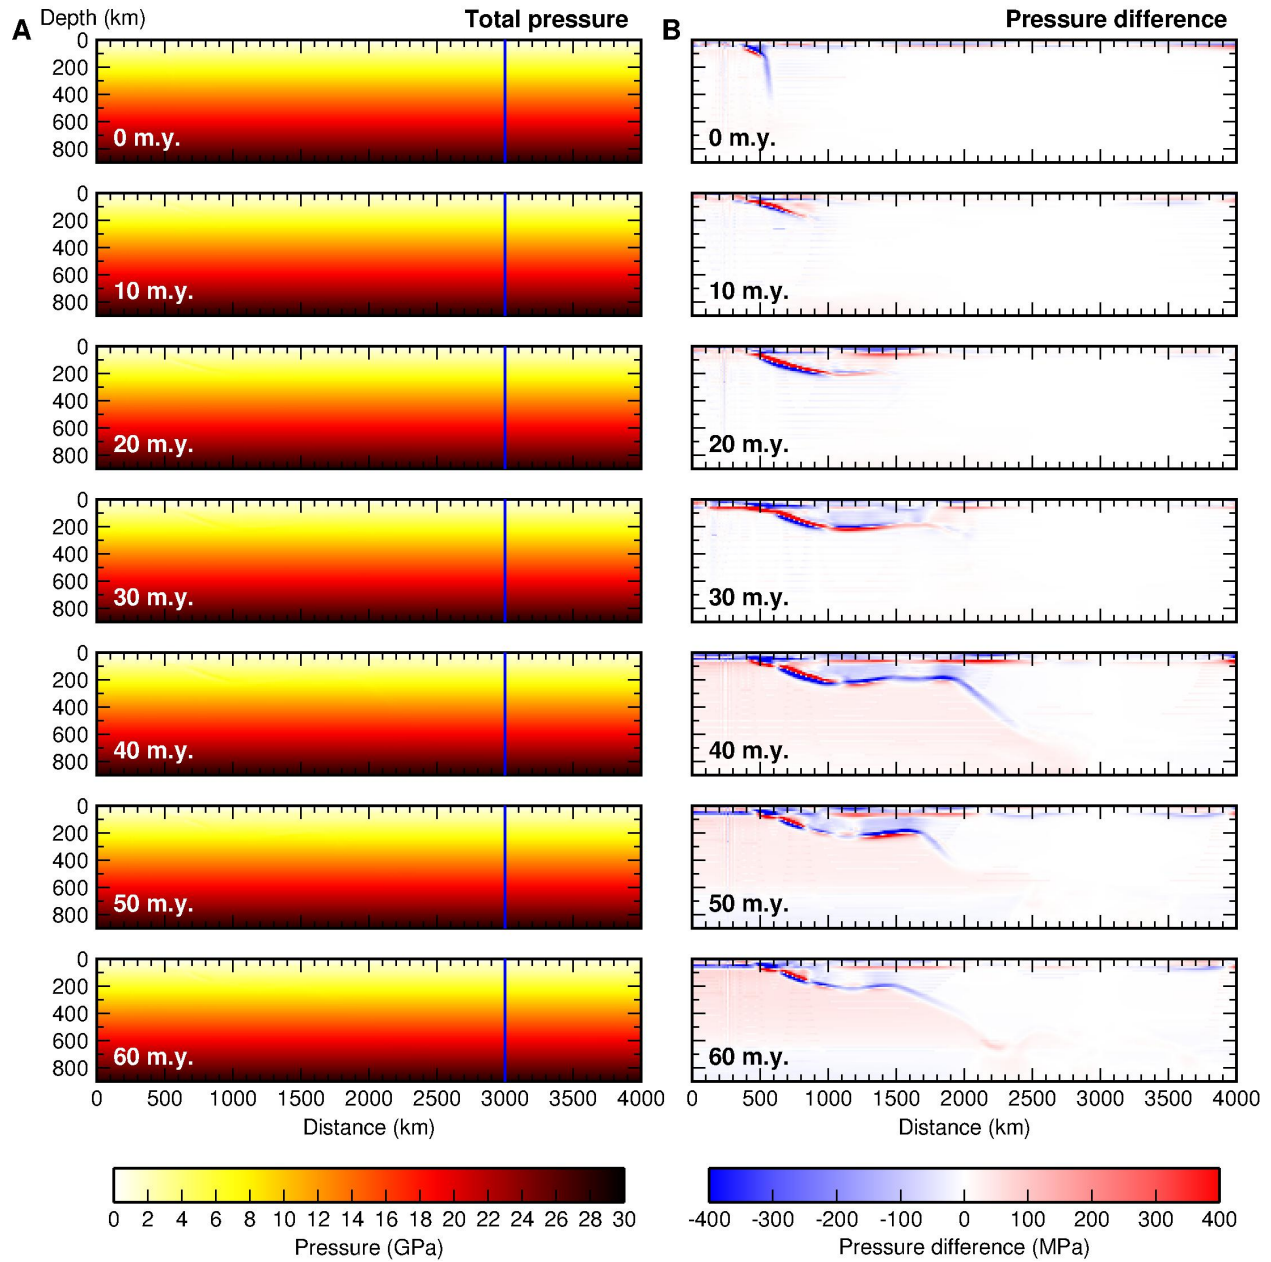

**Figure S3.** The evolution of (A) total pressure and (B) lateral pressure difference for Model 9. The pressure difference is relative to the vertical pressure profile at  $x=3000$  km at each time (blue lines in A).

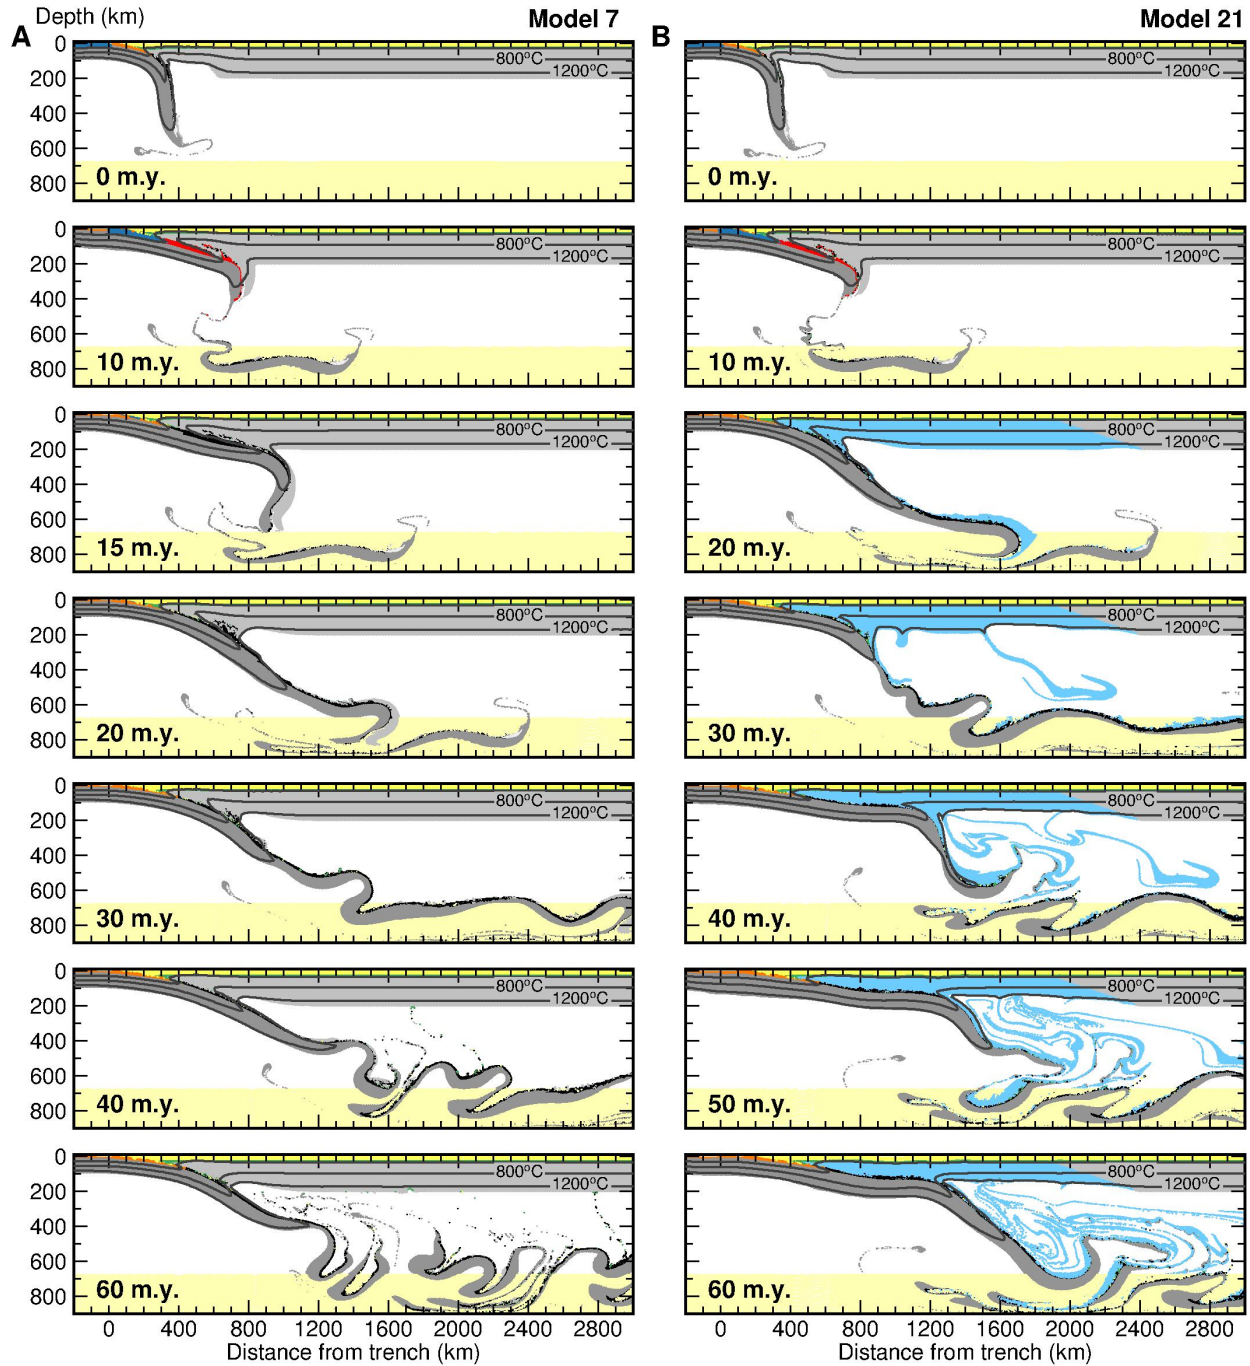

**Figure S4.** Evolution of (A) Model 7 and (B) Model 21 showing the effect of early oceanic plateau densification. In both models, the plateau crust undergoes densification by  $500 \text{ kg/m}^3$  from 10 to 20 m.y. In Model 21, the CML weakens by a factor of 10 over the same timeframe (blue). In Model 7, there is no weakening. Material colours as in Figure 1; black lines are isotherms every  $400^\circ\text{C}$ .



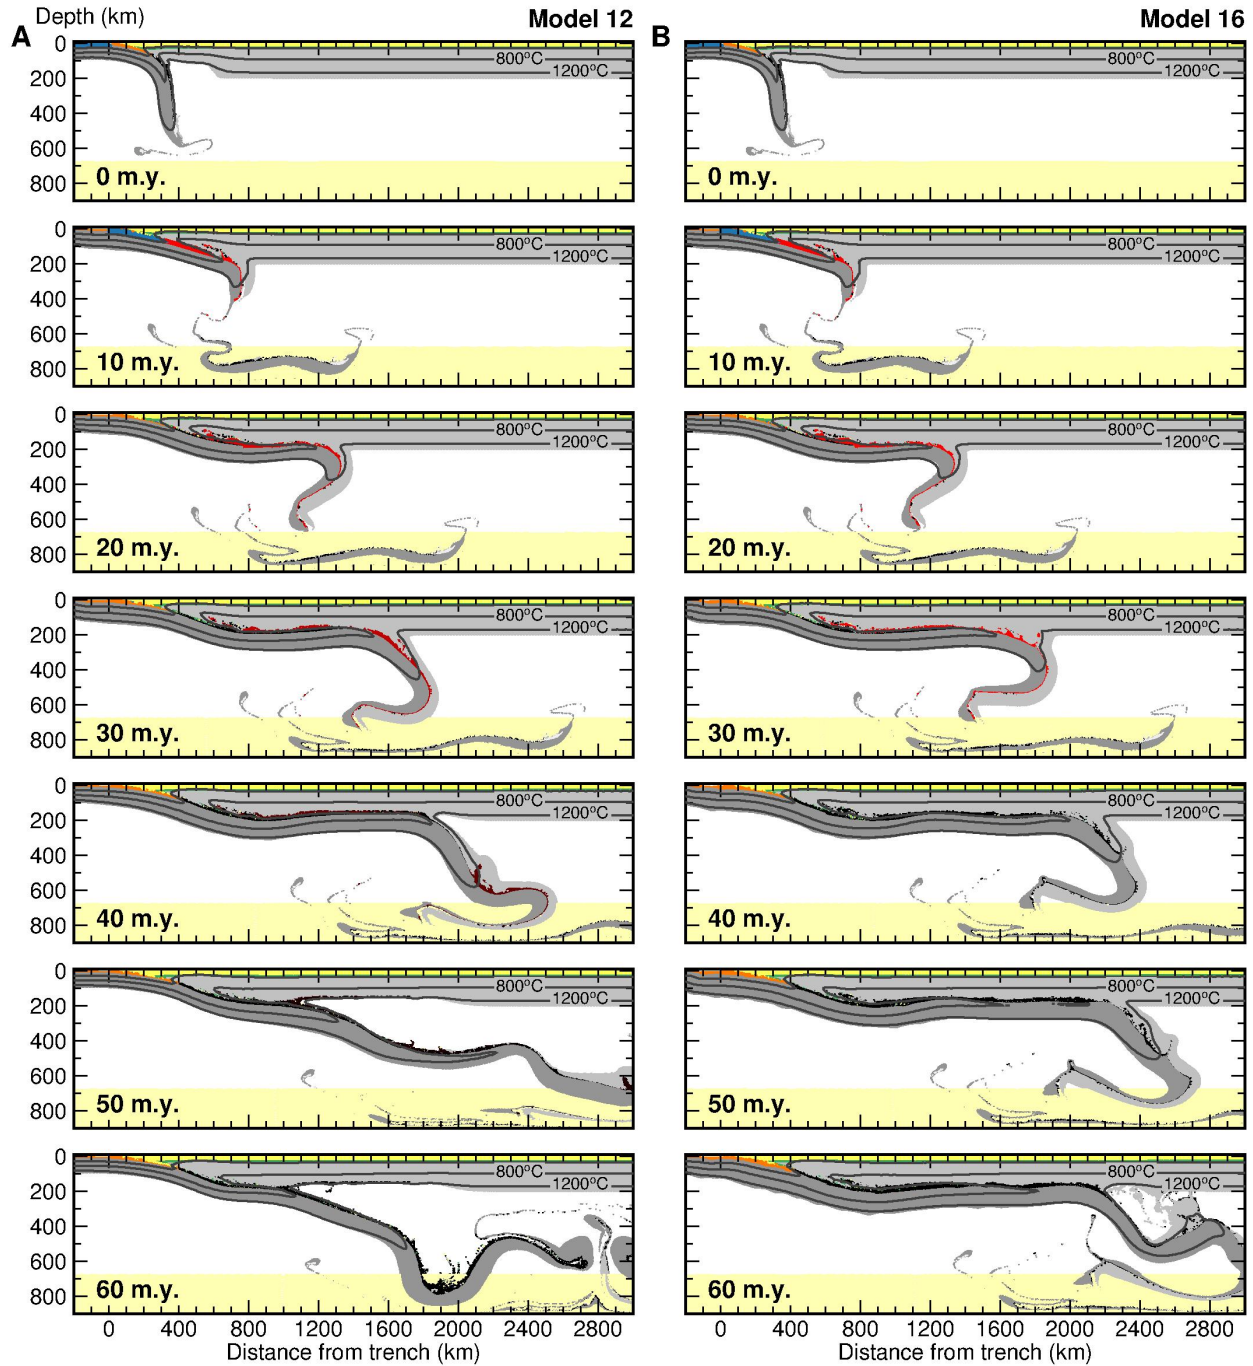

**Figure S5.** Evolution of (A) Model 12 and (B) Model 16. Model 12 tests a long duration of oceanic plateau eclogitization, where the plateau crust undergoes densification by  $500 \text{ kg/m}^3$  from 15 to 55 m.y. (rate of  $12.5 \text{ kg/m}^3$ ). Model 16 tests a lower eclogite density, where the plateau crust undergoes densification by  $100 \text{ kg/m}^3$  from 30 to 40 m.y. (rate of  $10 \text{ kg/m}^3$ ). In both cases, the CML remains strong ( $f=10$ ) throughout the model run. Material colours as in Figure 1; black lines are isotherms every  $400^\circ\text{C}$ .

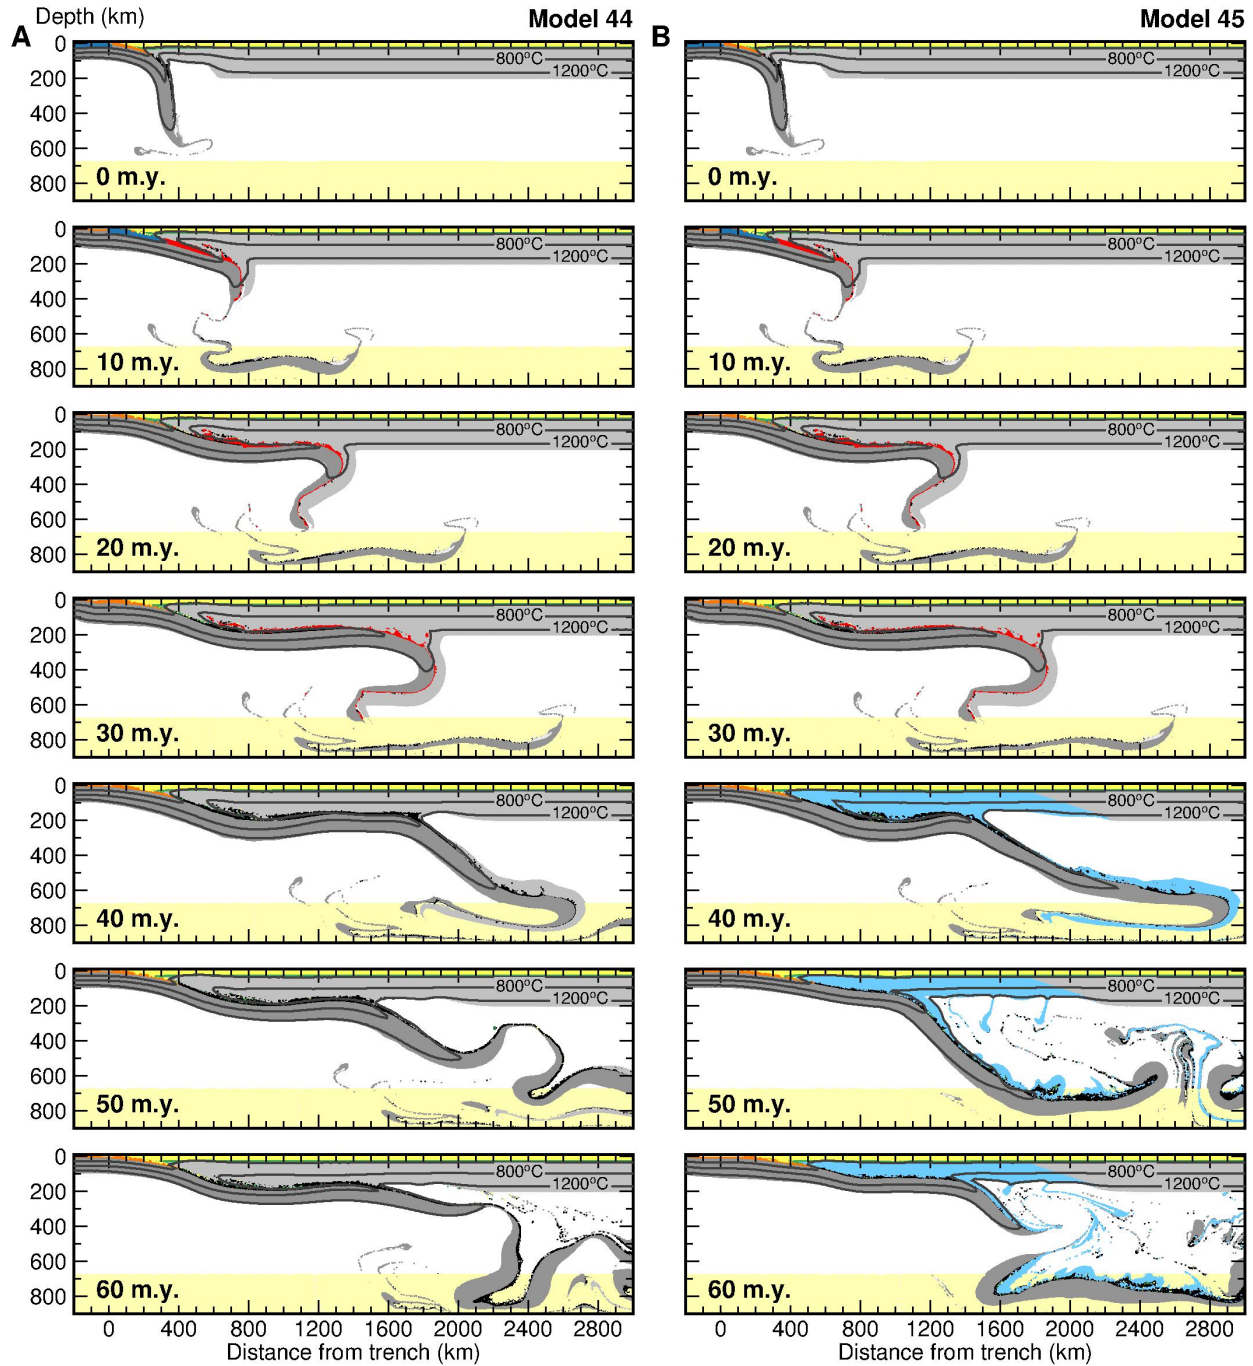

**Figure S6.** Evolution of (a) Model 44 and (b) Model 45, in which there is no change in plate velocities during the model run ( $V_o = 6$  cm/yr;  $V_c = 4$  cm/yr). In both models, the plateau crust undergoes densification by  $500 \text{ kg/m}^3$  from 30 to 40 m.y. In Model 45, the CML weakens by a factor of 10 over the same timeframe (blue). In Model 44, there is no weakening. Material colours as in Figure 1; black lines are isotherms every  $400^\circ\text{C}$ .

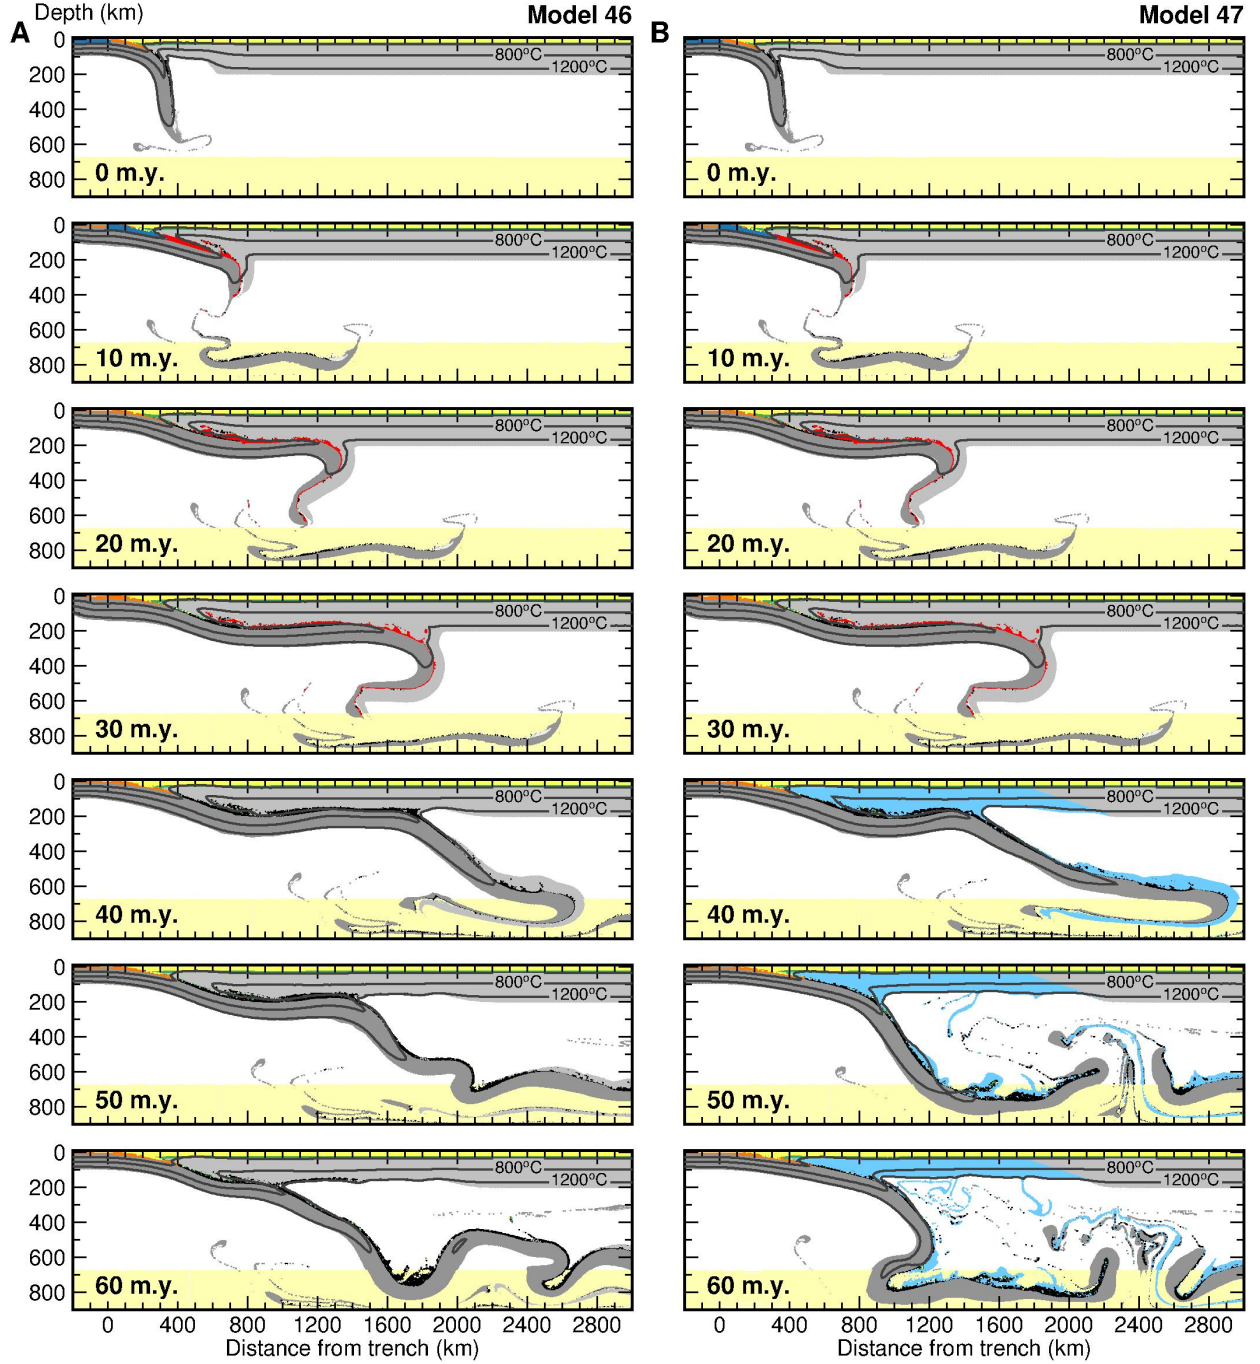

**Figure S7.** Evolution of (a) Model 46 and (b) Model 47, in which the continent is stationary after 40 Myr ( $V_o = 7$  cm/yr;  $V_c = 0$  cm/yr). In both models, the plateau crust undergoes densification by  $500 \text{ kg/m}^3$  from 30 to 40 m.y. In Model 46, the CML weakens by a factor of 10 over the same timeframe (blue). In Model 47, there is no weakening. Material colours as in Figure 1; black lines are isotherms every  $400^\circ\text{C}$ .
